# Supplementary material
Source: PubMed Central journal article supplement (PMC1197427)
Supplement: plntcell_tpc.105.031203_1.pdf [file plntcell_tpc.105.031203_1.pdf]

```

-----
-----AANGGG GTLGGGDDDP VVDLREAEVH
-----VPEDAD DETLAGAEDP VLDLREAEVL
-----DVENAD ELQQNGGATP DPGLGIGEVV
-----NFFSSA PSKRMLTREK AMLASFSPVH
-----PPSPSP PPKRQARDD-----PPH
-----ETNSEP MWKLYWTIRN AVHEKDRNVT
-----EQADEP MWKVYWTIRN AMD---KDVP
-----
-----MSDTEK
-----EDVKIQ KEEEPENNTV IEGVKEESQP
QIKLTAAGTI PKKRGRKAKR KTLNSNNSNS NSNSENTTAQ DSNGGTEQSN

LYGKRRSQKE EDEQEDLTKD MEDPTPVPNI EEVVLV-----
PYTKSKRGHR EEEQEDLTKD MDEPSPVPNV EEVTLP-----
VHKKSRN--- DDDDEDLTRD LDDPPAEPNV QEVHKAN---
-----
-----
-----MATPS MPAPAAEAAA AATTAT-----
PTAIERVSFAF PPAFRRVVNR LHPSVLAVMA AERAAA-----
PSAEP-VSAF PVATR RVVNR PHPSVLAVIA AERSAC-----
EDSGSRISDF PAVVKRVVIR PHASVMVVA AERAGL-----
NGPLTRARQA PSIMPSAADG VKSEVLNVAV GADGK-----
TGPLTRHSPL NPAPEDAPP-----QLHA GERDPP-----
LADNFLELPS KESYPDYDE IKNPVSIFMI NKRLKNGKYD LKSLVADLMQ
LADNFLELPC KESYPDYDE IKQPVSLFMI NKRLKNGQYD FKTLIADLMT
DKDVPMVDSH EATEEPPTS TNTPSFPHLA QEQAKE-----
DENTKEMDEV EEDEDDDDQP MISPDNSIFG DTKSESKQLG-----
GGDQMNVD SG SEVNDSNKRPLADPTSTPSK KQKHDDTYQQ QLPPQPIQPL

-----
-----
-----KVNVLKKD SENTPVKGGT
-----KTVNTKKD SESAPVKGGT
-----AALQSTAS PAPGGKSRGD NDMMPIKGGT
-----
-----
-----MAM KAPDPGGSGE
-----ANSMPL APPQPPSSGA
-----AAGAGAGG GGAAPPALEN
-----AGEG--SA AVAAAPVLEN
-----IGET--R GQGS LPALEN
-----PKEE-----
-----PRAW-----
MYSNAFDYNL ESSEVYISAE KLKALTI STC KQLVPSFDVS QYEPAPAQLT
MYSNAFEYNL ESSDVCIAAQ KLRNLT IATC KELVPSFDVS QFEPAPSAP
-----
-----
-----NTSSVANTPS EIPDAHKA EQ
QETTTTTTIPT DAENQQQIIQ QISQQQQLLQ NQLNQPSIQ QLPPPF AKPV

VADLDEQDE--ETVTAGGK EDEDP---AK GDQRSVDLG-----
MTDLDEQED--ESMETTGK DEDENSTGNK GEQTKNPDLH-----
MTDLDDDEMTG GSAAQAMSTG DGENSQTGKT SDNSNTQEF S SAK E-----
-----
-----MEAT-----
-----MSPPV AGAASSGDGP-----
-----ILPSTP SLSETTSGGA AAASKSAQLP-----
PFSQPSTAG TVKTEAPPPP STSASSAASA AAPAPAAAAA-----
ISHGQLQVLS SVLPDHPSLS NDPDKPSSYV CTPPLLMECR-----
ISYGQQQVLS GVLDPHASLA TDTDKPSTYV CTPPNLMEGH-----
ISFGQLQALS TVPADSLDLE RSDGSSSAYV ISPPPIMDGE-----
-----E ERNKAIREWE ALEAKIEADF-----
-----I EPAKLP-----PVSEEV-----
PVKPKATPHR ARIKIEMPDT DSEDSRTPPP THKRKSPKPP RENGS-----
NTPQKPKARA RQVKIEMPDT DSDDSRTPPP SHKRKSPKKN RENG-----
-----ESATLGA EVAHKKINYE QEAQKLEEKA-----
EDIIEKTESV DKKVDSGEER NEQEREIMND HSKSANPKKT TITRV-----
PNIAPPQTTT TTTSTTTTTN PTSPTKQTSPTGAAPITNR PRSSSKSSNP
-----
-----

```



```

-----SPSKT PEVYKEYRDF MINTYLQN-- -----PYQYL TLTAIRRNLV
G-----
G-----
G-----
G-----
G-----
S-----
G-----
ST-----
NT-----
G-----
G-----
G-----
NARDFNEPRS MIHMDAIQLE KAVLRAYEGM RN-TSLGSSI PSTPHSSSSN
NARQFNEPGS NIHQDAIQLE KAVLRAYDGM RSQQQYPMMV PYGQPTPPY
M-----
G-----
G-----

-----DCAVM
-----DCAIS
-----DCAIM
-----DVNLLQ
-----DVTLLR
-----DVVSIR
-----DVGSVR
-----PELYDLS
-----AELYDLS
-----VDIEDFA
-----DSEAKQ
-----EMDAQL
LMKAMKLTTP KSEVRGRGKK NFSGSDD--E ESARINIQQH QRSMEDAIMQ
MMPAG--KTP KTETRGR--KK KYGGPEDNEE ELARQQMIQQ QRQIDQAILQ
-----DVASIV
-----DAAALF
-----DVCSIL

RVHAGGEQWG LVNYQVDPES -----RPMAMGPPP
RVHAFLEQWG LINYQVDAES -----RPTPMGPPP
RVHAFLEQWG LINYQIDADV -----RPTPMGPPP
KVFLFLEKWG LINFSSSLKK -----NDHLLSVDN
KLFAFLDSSG LINFASPSR -----PEAQQQQRQ
RVFDFLDSWG LINYNSSASA -----KPLKWEKE
RVFDFLEEWG LINYGASPSG -----AKQGRDKKE
RIVRFLDAWG IINYLAAGSV -----QRGLRMAAT
RIVRFLDTWG IINYLASGSV -----HRGLRMATS
RVFRFLDHWG IINYCATAQS -----HPGPLRDVS
EVMEFLDYWG LINFHFPFPT -----DTGS----T
KVLEFLSHWG LINFHFPFPPA -----VQGVSELVE
LPIEEQKMWR LFKSMKDVR-----EEGTNRPLA
LPIEEQKMWR LFKSMKDVR-----DDDSSRPLA
KIHFLEKWG LINYQIDPRT -----KPSLIGPSF
RLHKFLTKWG LINYQVDSKL -----LPKNIEPPL
RVHSFLEHWG LINYFVNPDG GAYIPLLSSN NNNNNNNNNN NNNNNNNNNN

TPHFNVLADT P--LACAS-- -----
TSHFVVLADT PSGLVPLQ-- -----
TSHFHLSDT PSGLQSIN-- -----
AKIEQGTPAG IRVTATPNSL RPITAPPLVE ERVETGIKVP P-----
TEAEAVVEAP VGLQVTPRPP PSYFAEEKGG GGNENGFRLP P-----
AGKSAGDAAS EPATTVKE-- -----
EAALSQSSLP IGAT-----
LIREEPTGEL HLMSAPLKSI DGLILFDRPK CSVRAEDIAS GAS-----L
LLREEPTGEL QLLTAPLKSI DGLILFDRPK CNLQAEDISS LAS-----N
DVREDTNGEV NVPSAALTSI DSLIKFDKPN CRHKGGEVYS -----
ASDHDDLGDK ESLLNSLYRF QVDEACP-PL VHKPRFTAQA T-----
SITNADTEEK ISVVDKLFQF ETLQSYLIPA PNQAEVTAPI H-----

```

|            |             |             |            |            |
|------------|-------------|-------------|------------|------------|
| VNFMRLPSKE | EFPAYYDVIK  | KPMDMMRIKH  | KLENRQYVTL | LDV-----V  |
| VNFMRLPTKE | EFPGYDVIK   | KPMDFMRIKA  | KLENRQYVTL | LDV-----V  |
| TGHFQVVLDT | PQGLKPFLE   | NVIKQVEVEG  | DGAEPQVKKE | FPVNLTIKKN |
| TSQYSTRHDA | PRGLFPFESY  | KPSVQLPDMA  | KLKMMNTSD  | SES-----   |
| NSNNSNNNTI | ERETTTTSTT  | TTTTTTTKEK  | ITSPKQSTSS | SSSSSSSSSS |
| -----      | -----       | DLRSPQVPAA  | QQMLNFPEK- | -NKE-----  |
| -----      | -----       | PKTPQQTSAS  | QQMLNFPDK- | -GKE-----  |
| -----      | -----       | PQKTQQPSAA  | KTLLDLDKKP | LGKDGLELG  |
| -----LTS   | YSDVFSDLKK  | PDHVLVCAHC  | GERCDSPFYQ | HNKGIVN--- |
| -----LTS   | YSDVFGWEA-  | PGMAPICGLC  | GMECRDGNAQ | ILKDGFK--- |
| -----      | -----       | -TAKRNCNGC  | KAICSIACFA | CDKYDLT--- |
| -----      | -----       | -MPSKLCTGC  | RTVCGLAYFS | CEKADIS--- |
| SSSPGMENDG | AGFDEKTLE   | RLSESFCSFC  | AQPLPSLHYE | SQKEADIA-- |
| SEVVDFDAGL | AELDGK-IRE  | RLSESSCSYC  | LQPLTSLHYQ | SLKEADIA-- |
| -SLPSLDGDS | PDLDIR-IRE  | HLCDSHCNHC  | SRPLPTVYFQ | SQKKGDIL-- |
| -PSGLFPDPM | AADELLKQEG  | PAVEYHCNSC  | SADCSRKRYH | CPKQADFD-- |
| -TPSLLSEPT | LTEDSITQAE  | SSVEYHCNSC  | SVDCSRKRYH | CRTQADFD-- |
| SDFMLMLSNA | CKFNETDSDI  | YKEAVSLQKA  | LLEMKRELDT | GDDAPRVQVE |
| SDFMLMLSNA | CKFNETDSVI  | YKEAVSLQKY  | LLEMKRSLDS | GEDAPRVQVE |
| VYDSAQDFNA | LQDESRNSRQ  | IHKVYICHTC  | GNESINVRyh | NLRARDTN-- |
| -----TL    | YKYLKESKRK  | YDEITHPPST  | TDDENGDKND | NGGKMNN--- |
| TNNISKPFST | SLDLRQNLFS  | QPFRHICSKC  | SQDCTFLRYS | FTPAPPPQDQ |
| -----      | -----KP     | VDLQN-----  | -----FGL   | RTDIYSKK-T |
| -----      | -----KP     | TDMQN-----  | -----FGL   | RTDMYTKKNA |
| DKSG-----  | -----LTGIKT | EALENGAAGG  | LSSGVSQFGL | KLDQYAKKPA |
| -----      | -----ICE    | KCFKNG----- | -----      | NYGEN--NTA |
| -----      | -----VCS    | KCYANND---  | -----      | NKGEANIHPG |
| -----      | -----LCA    | RCYVRS----- | -----      | NYRVGINSSE |
| -----      | -----LCA    | RCYVRA----- | -----      | NYRPLTSAD  |
| -----      | -----LCS    | DCFHDAR---  | -----FVT   | GHSSLDFQRV |
| -----      | -----LCS    | DCFHDAR---  | -----YIT   | GHSSLDFQRI |
| -----      | -----LCC    | DCFHHGR---  | -----FVV   | GHSCLDVFRV |
| -----      | -----LCT    | ECFNNGG---  | -----FSS   | DMSSSDFILM |
| -----      | -----LCC    | DCYDKGN---  | -----LDA   | GMSQTDFIIM |
| LRTI-----  | -----FTSIFA | SLFSKKD---  | -----EEG   | KCYSDHLTEF |
| LRTI-----  | -----FTSIFA | ALYSKKD---  | -----EDG   | KCWADYFIEF |
| -----      | -----LCS    | RCFQEGHFG-  | -----      | --ANFQSSDF |
| -----      | -----EVST   | STSMGTGDAN- | -----      | LLEEGETSRP |
| AVSGEQVIQP | QPPQTILLCN  | NCFTNDQT--  | -----FID   | HSHLIKQDFK |
| LAKSKG-ASA | GRGWTEQETL  | LLL-----    | EALEMYKDDW | NKVSEHVG-S |
| PSKSKAAASA | TREWTEQETL  | LLL-----    | EALEMYKDDW | NKVSEHVG-S |
| AMRNRTAASM | AREWTDQETL  | LLL-----    | EGLEMHKDDW | NKVCEHVG-S |
| DDFKLIGNSA | AAVWTEEEIL  | LLL-----    | ESVLKHGDDW | ELISQSVS-T |
| DKKERIDNHS | SSAWTDAETL  | LLL-----    | EGVLKHGDDW | DLIAQHVR-T |
| FKRVEISEES | KPEWSDKEIL  | LLL-----    | EAVMHYGDDW | KKVASHVI-G |
| FKRIEITEDA | KSDWTDKETL  | HLL-----    | EAVLHYGEDW | KKVSHHVG-S |
| DGKKDGLDND | GDSWTDQETF  | LLL-----    | EGIDKYKENW | NAVAEHVG-T |
| DGDNDRSEND | GDSWTDQETL  | LLL-----    | EGIEKYNDNW | NNIAEHVG-T |
| DPMKFYGDQD | GDNWTDQETL  | LLL-----    | EAVELYNENW | VQIADHVG-S |
| EPAEAPG-VG | SGKWTDQETL  | LLL-----    | EALEIFKENW | NEIAEHVA-T |
| ESAEIPG-FG | GTSWTDQETL  | LLL-----    | EALEIFQAKW | GDIAEHVA-T |
| TEVLKANGVP | SSEWPFTLDQ  | IKMNIDKCRY  | RRLDKLQKDF | FDLFERAR-E |
| PDLMKAAGVP | PAEWPFTMDQ  | IKINIDKCRY  | RRLDKLQKDF | FDLFETAR-E |
| IRLENNGNSV | KKNWSDQEML  | LLL-----    | EGIEMYEDQW | EKIADHVGGH |
| LKKVKILEQI | DENWSKEDLQ  | KLL-----    | KGIQEFGADW | YKVAKNVG-N |
| KIELPEPSPL | EDQWTDQETL  | LLL-----    | EALDIYSDSW | NDVADHVK-T |
| RTQDECILHF | LRLPIEDPYL  | ENSDASLGPL  | AYQPVPFSQS | GNP-----   |
| RTQDECILHF | LRLPIEDPYL  | EDSEASLGPL  | AYQPIPFQS  | GNP-----   |
| RTQDECILHF | LRLPIEDPYL  | EDDGGFLGPL  | ACQPIPFSS  | GNP-----   |
| KSRLDCISKL | IELPFGEFLM  | GSASGRL---  | N---PSILTE | DEN-----   |
| KNKSECIARL | IQLPFGEHML  | GTVNGKL---  | DNRLHKIQT  | DGK-----   |
| RTEKDCVSQF | VKLPFGEQFV  | KESD-----   | -----SE    | DGL-----   |
| RSEKDCIARF | TRLPFGEQFM  | GP-----     | -----KE    | DKI-----   |
| KSKIQCLHFF | LRLPVEDGLL  | ENIKVPEASF  | SSKFWMQNA  | S-----     |







```

-----N VATAAAAALA SAATKAKHLA
-----N LSTAAAAALA AAAVKAKHLA
-----G TGTGTGPLAV PKEGTFSENN MQTAAAAALA SAAVKAKHLA
----- --ASVATALG AAAAQAKILA
----- --AAVATSIG VAAARAKMLA
----- --ETTRNESE RAWADAKSLI
----- --LSANDLLK EASANAQVQL
-----N VRHAARCGLS AAATKCKLFA
-----K VKHAAMCGLS AAATKAKLFA
-----K VMAAFRAGLS AAATKAKLFA
-----S VSEEKQPGSR TENSTTKLDA
-----N TTSTSSKNTR KLSNAKESKD
DVFVCETMVN GSADTPDDCS LFGFQSIVDE FSDAQTMNLD YGKAMRKMKA
DVFVCETMVN GTADAPDDCS LIGYDPANE FTDVQTMNLD YAKSMKMKMT
-----DDKLG KVSDKSREIS
-----GSEIAIS SLGYRSHIFA
----- IQAAAATLA ATSIKAKALS

```

```

AVEERKIKSL VALLVETQMK KLEIK----- --LRHFEGE ETIMDREKEA
AVEERKIKSL VALLVETQMK KLEIK----- --LRHFEEEL ETIMDREREA
ALEERKIKSL VALLVETQMK KLEIK----- --LRHFEEEL EATMEREREG
DQEEREMEQE AATVIEQQLK KLQSK----- --LKFLDDL ESIMDEEEKV
DQEEREMELL MASIIETQLK KIQYK----- --IKHFEEL ELIMDQEYAT
EKEEHEVEGA IKETVEVEMK KIRDR----- --IVHFEKL DLEMERSRQK
EKERKAIQES LSDIVGVQMK EIQDK----- --IRRFEQK ELLMEKERQK
DQEEREIQRL SATIINHQLK RLELK----- --LKQFADI ETYLLRDSEQ
DQEEREIQRL TATVINHQLK RLELK----- --LKQFAEV ETLLEKECEQ
DHEEREIQRL SANIVNHQLK RMELK----- --LKQFAEI ETLLMKECEQ
VQEKRSSKPV TTDNSEKPDV IICPSQDKCS GKELQEPLKD GNKLSENKND
ESPQVEPKPS SANDCDNPIS QVAKR-----A SDNIRGHSST VLPVSLNNTN
HKLHVSIPNE EVLFYKQPIK MDKELSPLLK GEGVMPLDHL DEMMDDDTDG
YKLHVSIPNE EILFYKQPIK MEKELSPRVN GDGVMPLDHL DEMMDDDTDG
EKYIEESQAI IQELVKLTME KLESK----- --FTKLCDL ETQLEMEKLLK
TNEERQMNFL TNELIRLQME KLDK----- --LNHLKKL EKFMELERKT
KSEEREIQSL ILKIINVQTK KLELK----- --LKCYSER ENALEKEKNQ

```

```

LEQQRQQLLT ER-----
LEYQRQQLLA DR-----
LEYQRQQLIT ER-----
IEGVKETIIQ ER-----
LQMKSSSLVD EWQKQSQQFG VWRIGAILNR LGFDRTAGME SHRRAPPFFP
LEEVRNLLFV DQ-----
LHCLKELLFS DQ-----
SERMRQGLQA QRIR-----
VERIRQRIAS DRVR-----
VEKTRQRFSA ERAR-----
ASQSTVSQSA ADAS-----
EPCSISSQEA SAGN-----
SESVSSSIHP KILKEGSPPA TVQSQTSSVS TPPQHPSISA EMPIMTPKAV
SESVTSSSHP PPATSSSPPE TPSESGDVA ATVAAVANQT ASTPVTPKAV
YVKESEKMLN DR-----
LERQENLLI QR-----
LEKERQALFS ER-----

```

```

NAERRRRQPK TPPSSPPGLS VSPNLRHLS SPRPPPPDAQ FTGALMAKKG

```

```

KSKSGYILFS AEVRKRIMHE NPDAGFGEVS KIVGIEWKKL SEEQKKHYEM
KSKSGYILFS AEVRKRIMHE NPDSGFGDVS RIVGVEWKKL SEEQKKHYEL

```





```
-----
AMNAPSTSAA PNVMFDPDM PGPSNQG--- -----
SGNNSSVG-- -----
TGSGSGSGLG LN-----
PGFPVPGSFV AATMTGSSD PSPGSDNVSS V-----
PGSRLPVGYG VNQHLLRS-- -----
GNARAPSHWI RRIENGRPVA REEDVTKALW KLRDELLKST CSLVMDRPTQ
PNARPPTNWI RRTEAGRPVA REEDVTKALW RLRDELLKST CGMVLERPT-
-----
-----
-----
```
